# Supplementary material
Source: PubMed Central journal article supplement (PMC4300623)
Supplement: JVI.02718-14_zjv999099939so1.pdf [file JVI.02718-14_zjv999099939so1.pdf]

Supplemental Materials:

Table S1: Amino acid differences in bovine IDV compared to swine IDV. HEF Amino acid differences that are unique to D/3-13 are in outlined boxes. Amino acid site mutations that are conserved across bovine species are shaded grey.

| Virus   | HEF Mutations D/swine AA /site/ D/Bovine AA |      |      |      |       |       |       |       |       |       |       |       |       |
|---------|---------------------------------------------|------|------|------|-------|-------|-------|-------|-------|-------|-------|-------|-------|
| D/1-35  |                                             |      |      | P89S | S164G |       |       |       |       |       |       | A251T | K252T |
| D/14-22 |                                             | T78N |      |      |       |       | R157K |       |       |       |       | A251T | K252T |
| D/3-13  | I68V                                        |      | D80A |      | S164G | V115I |       | T181K | A188T |       | V215A | A251T | K252A |
| D/9-5   | I68V                                        |      | D80A |      | S164G |       |       | T181K | A188T | K212R | V215A | A251T | K252A |
| D/11-8  | I68V                                        |      | D80A |      | S164G |       |       | T181K | A188T | K212R | V215A | A251T | K252A |
| D/13-21 | I68V                                        |      | D80A |      | S164G |       |       | T181K | A188T | K212R | V215A | A251T | K252A |

| Virus   | HEF Mutations D/swine AA /site/ D/Bovine AA |       |       |       |       |       |       |       |       |       |       |       |  |
|---------|---------------------------------------------|-------|-------|-------|-------|-------|-------|-------|-------|-------|-------|-------|--|
| D/1-35  |                                             |       |       |       |       | A289T |       |       |       | K308R |       |       |  |
| D/14-22 |                                             |       |       |       |       |       |       |       |       | K308R |       |       |  |
| D/3-13  | F256L                                       | I273V |       | N288G | A289S |       |       |       | K308R | R312K |       | D372G |  |
| D/9-5   | F256L                                       | I273V | M276X | N288G | A289S |       |       |       |       | R312K |       |       |  |
| D/11-8  | F256L                                       | I273V |       | N288G | A289S |       |       |       | K308R | R312K | T348I |       |  |
| D/13-21 | F256L                                       | I273V |       | N288G | A289S | K292R | S306R | K308R | R312K |       |       |       |  |

| <b>Virus</b>   | <b>HEF Mutations D/swine AA /site/ D/Bovine AA</b> |       |       |       |       |       |       |       |       |       |       |       |
|----------------|----------------------------------------------------|-------|-------|-------|-------|-------|-------|-------|-------|-------|-------|-------|
| <b>D/1-35</b>  | R448K                                              |       |       | I463V |       |       |       |       |       |       |       |       |
| <b>D/14-22</b> | R448T                                              |       |       |       |       |       | G487R |       |       |       |       |       |
| <b>D/3-13</b>  |                                                    |       | I459V |       | V469I | N486S |       | K627N |       |       | S654F |       |
| <b>D/9-5</b>   |                                                    |       |       | I463V | V469I | N486S |       | K627N |       | V649M | S654F | I658S |
| <b>D/11-8</b>  |                                                    | I456A |       |       | V469I | N486S |       | K627N | I641M |       | S654F |       |
| <b>D/13-21</b> |                                                    |       |       |       | V469I | N486S |       | K627N |       |       | S654F |       |

| <b>Virus</b>   | <b>NP Mutations D/swine AA /site/ D/bovine AA</b> |      |       |       |       |       |       |
|----------------|---------------------------------------------------|------|-------|-------|-------|-------|-------|
| <b>D/1-35</b>  |                                                   | P74L | S132T | E247D | K381E | A462T |       |
| <b>D/14-22</b> |                                                   |      |       | E247D | K381E |       |       |
| <b>D/3-13</b>  |                                                   | P74L | S132T | E247D | K381E | A462T |       |
| <b>D/9-5</b>   |                                                   | P74L | S132T | E247D | K381E | A462T |       |
| <b>D/11-8</b>  |                                                   | P74L | S132T | E247D | K381E | A462T | D552N |
| <b>D/13-21</b> | K41R                                              | P74L | S132T | E247D | K381E | A462T |       |

| <b>Virus</b>   | <b>NS Mutations D/swine AA /site/ D/bovine AA</b> |       |       |       |
|----------------|---------------------------------------------------|-------|-------|-------|
| <b>D/1-35</b>  | D168N                                             |       |       |       |
| <b>D/14-22</b> |                                                   |       |       | D228N |
| <b>D/3-13</b>  |                                                   |       | V189I |       |
| <b>D/9-5</b>   |                                                   | F122L |       |       |
| <b>D/11-8</b>  |                                                   |       |       |       |
| <b>D/13-21</b> |                                                   |       |       |       |

| <b>Virus</b>   | <b>P3 Mutations D/swine AA /site/ D/bovine AA</b> |      |      |       |       |       |       |       |       |       |       |       |       |       |
|----------------|---------------------------------------------------|------|------|-------|-------|-------|-------|-------|-------|-------|-------|-------|-------|-------|
| <b>D/1-35</b>  |                                                   | K69R |      |       |       |       |       |       | L266M | T322I |       |       | R539K |       |
| <b>D/14-22</b> |                                                   |      |      | R101K |       | K110R |       |       |       |       |       |       |       |       |
| <b>D/3-13</b>  | V4I                                               | K69R |      |       |       |       | R214K | K257R | L266M | T322I | R361K |       |       | E675K |
| <b>D/9-5</b>   |                                                   | K69R |      |       | V106I |       |       |       | L266M | T322I |       |       |       |       |
| <b>D/11-8</b>  |                                                   | K69R | I74V |       |       |       |       |       | L266M | T322I |       |       |       |       |
| <b>D/13-21</b> | V4I                                               | K69R |      |       |       |       |       | K257R | L266M | T322I | R361K | I447V |       |       |

| <b>Virus</b>   | <b>P42 Mutations D/swine AA /site/ D/bovine AA</b> |      |      |      |      |      |      |      |      |       |       |       |       |       |       |
|----------------|----------------------------------------------------|------|------|------|------|------|------|------|------|-------|-------|-------|-------|-------|-------|
| <b>D/1-35</b>  |                                                    |      | M26L | K27R | K37R | E38D | K41R | C91S | N93S |       | P257S | G290S | L316F |       | P366L |
| <b>D/14-22</b> |                                                    |      |      |      |      |      |      | C91S |      |       |       |       |       | S328N |       |
| <b>D/3-13</b>  |                                                    |      | M26L | K27R | K37R | E38D | K41R | C91S | N93S |       | P257S | G290S | L316F |       | P366L |
| <b>D/9-5</b>   | V17I                                               |      | M26L | K27R | K37R | E38D | K41R | C91S | N93S |       | P257S | G290S |       |       | P366L |
| <b>D/11-8</b>  |                                                    |      | M26L | K27R | K37R | E38D | K41R | C91S | N93S | L248W | P257S | G290S | L316F |       | P366L |
| <b>D/13-21</b> |                                                    | P19L | M26L | K27R | K37R | E38D | K41R | C91S | N93S |       | P257S | G290S | F316L |       | P366L |

| <b>Virus</b>   | <b>PB1 Mutations D/swine AA /site/ D/bovine AA</b> |       |       |       |       |       |       |
|----------------|----------------------------------------------------|-------|-------|-------|-------|-------|-------|
| <b>D/1-35</b>  |                                                    | K372R |       |       |       |       |       |
| <b>D/14-22</b> |                                                    |       |       | R434K |       |       |       |
| <b>D/3-13</b>  |                                                    | K372R | D398N |       |       |       |       |
| <b>D/9-5</b>   | E64K                                               | K372R |       |       |       | R455K | R663K |
| <b>D/11-8</b>  |                                                    | K372R | D398E |       | P458S |       | R663K |
| <b>D/13-21</b> |                                                    | K372R |       |       |       |       |       |

| <b>Virus</b>   | <b>PB2 Mutations D/swine AA /site/ D/bovine AA</b> |       |       |       |       |       |
|----------------|----------------------------------------------------|-------|-------|-------|-------|-------|
| <b>D/1-35</b>  | K119R                                              |       | A293S | M352I | V521I |       |
| <b>D/14-22</b> | K119R                                              | V151M | A293S | M352I | V521I | K599R |
| <b>D/3-13</b>  |                                                    |       |       |       | V521M |       |
| <b>D/9-5</b>   | K119R                                              |       | A293S | M352I | V521I |       |
| <b>D/11-8</b>  | K119R                                              | V151M | A293S | M352I | V521I |       |
| <b>D/13-21</b> | K119R                                              | V151M | A293S | M352I | V521I |       |
